# Supplementary material for: Mono(sulfido)-bridged mixed-valence nitrosyl complex: protonation and oxidative addition of iodine across the Ir(ii)–Ir(0) bondElectronic supplementary information (ESI) available: experimental details and characterisation of the isomers of spy-6. See http://www.rsc.org/suppdata/cc/b2/b211021k/
Source: Royal Society of Chemistry journal article supplement (doi:10.1039/b211021k), 2003-01-22

# Electronic Supplementary Information (ESI)

**“Mono(sulfido)-bridged mixed-valence nitrosyl complex: protonation and oxidative addition of iodine across the Ir(II)Ir(0) bond”**

**Takanori Hattori,*a* Shoji Matsukawa,*a* Shigeki Kuwata,**b* Youichi Ishii**c* and Masanobu Hidai**d***

*a* Department of Chemistry and Biotechnology, Graduate School of Engineering, The University of Tokyo, Hongo, Bunkyo-ku, Tokyo 113-8656, Japan

*b* Department of Applied Chemistry, Graduate School of Science and Engineering, Tokyo Institute of Technology, O-okayama, Meguro-ku, Tokyo 152-8552, Japan. Fax: +81-3-5734-2637; E-mail: skuwata@o.cc.titech.ac.jp

# *c* Department of Applied Chemistry, Faculty of Science and Engineering, Chuo University, Kasuga, Bunkyo-ku, Tokyo 112-8551, Japan. Fax: +81-3-3817-1895; E-mail: ishii@chem.chuo-u.ac.jp

*d* Department of Materials Science and Technology, Faculty of Industrial Science and Technology, Tokyo University of Science, Noda, Chiba 278-8510, Japan. Fax: +81-4-7123-9362; E-mail: hidai@rs.noda.tus.ac.jp

**Experimental details**

# General

All manipulations were carried out under an atmosphere of nitrogen by using standard Schlenk techniques. Solvents and triethylamine were dried by common procedures and degassed before use. Complexes [IrCl2(NO)(PPh3)2] **1**1 and [Cp*IrH(SH)(PMe3)] **2**2 were prepared according to the literature. 1H (270, 300 or 400 MHz) and 31P {1H} (109, 121 or 162 MHz) NMR spectra were recorded on a JEOL EX-270, a Varian Vnmr 5.3, a JEOL LA-400 or a JEOL GSX-400 spectrometer, whilst IR spectra were recorded on a Shimadzu 8100 or a JASCO FT/IR-410 spectrometer. Elemental analyses were performed on a Perkin-Elmer 2400II CHN analyser.

# Preparation

**[Cp*Ir(PMe3)(-S)Ir(NO)(PPh3)] 3.** A THF (40 cm3) solution of **2** (171.8 mg, 0.393 mmol) and triethylamine (0.20 cm3, 1.4 mmol) was added to a suspension of [IrCl2(NO)(PPh3)2] (382.7 mg, 0.468 mmol) in THF (20 cm3), and the reaction mixture was stirred at room temperature for 12 h. Then the solvent was evaporated to dryness, and the residue was extracted with benzene (20 cm3). Addition of methanol (15 cm3) to the concentrated extract afforded **3** (272.7 mg, 75 % based on **2**) as reddish black crystals. In some runs, we observed concurrent formation of red crystals of [Ir(NO)(PPh3)3] (~3%) as a by-product, which were separated manually. Found: C, 40.64; H, 4.36; N, 1.53; C31H39Ir2NOP2S requires C, 40.47; H, 4.27; N, 1.52%. H(C6D6) 1.37 [9 H, d, *J*(PH) 9.8 Hz, PMe3], 2.07 (15 H, s, Cp*), 7.027.89 (15 H, m, PPh3); P(C6D6) 43.9 [1 P, d, *J*(PP) 15.3 Hz, PMe3], 0.0 [1 P, d, *J*(PP) 15.3 Hz, PPh3]. ~max(NO)/cm1 1684 (KBr).

**[Cp*Ir(PMe3)(-I)(-S)Ir(NO)I(PPh3)] 6.** A THF (7.5 cm3) solution of iodine (45.1 mg, 0.178 mmol) was added to a solution of **3** (162.2 mg, 0.176 mmol) in THF (7.5 cm3) at 78 C. The reaction mixture was stirred at 78 C for 30 min, and then at room temperature for 2 h. The solvent was evaporated to dryness and the residue was recrystallized from CH2Cl2diethyl ether (6 cm3 / 20 cm3) at 20 C to give *spy*-**6** (191.6 mg, 93 %) as dark brown crystals. Found: C, 31.89; H, 3.31; N, 1.33; C31H39I2Ir2NOP2S requires C, 31.72; H, 3.35; N, 1.19%. H(CD2Cl2, at r.t.) 1.73 (15 H, br s, Cp*), 1.80 [9 H, br d, *J*(PH) 10.2 Hz, PMe3], 7.347.65 (15 H, m, PPh3); P(CD2Cl2, at r.t.) 34.2 (1 P, br s, PMe3), 0.5 (1 P, br s, PPh3). ~max(NO)/cm1 1518 (KBr).

**[Cp*Ir(PMe3)(-H)(-S)Ir(NO)(PPh3)][OSO2CF3] 7.** To a THF (30 cm3) solution of **3** (504.0 mg, 0.548 mmol) was added triflic acid (0.0485 cm3, 0.548 mmol), and the mixture was stirred at room temperature for 14 h. The solvent was evaporated to dryness and the residue was recrystallized from CH2Cl2****diethylether (3 cm3 / 15 cm3) to give **7** (570.0 mg, 97 %) as red crystals. Found: C, 35.96; H, 3.75; N, 1.37; C32H40F3Ir2NO4P2S2 requires C, 35.91; H, 3.77; N, 1.31%.H(CDCl3) 9.83 [1 H, dd, *J*(PH) 18.9 Hz, 47.0 Hz, Ir2H], 1.66 [9 H, d, *J*(PH) 11.0 Hz, PMe3], 2.11 (15 H, s, Cp*), 7.497.61 (15 H, m, PPh3); P(CDCl3) 33.9 [1 P, d, *J*(PP) 5.5 Hz, PMe3], 1.1 [1 P, d, *J*(PP) 5.5 Hz, PPh3]. ~max(NO)/cm1 1773, ~max(SO)/cm1 1268 (KBr).

**Preparation of [Cp*Ir(PMe3)(-I)(-S)Ir(NO)(PPh3)][OSO2CF3] 6’.** A mixture of **6** and an equimolar amount of silver triflate in THF was stirred at room temperature for 12 h, and the resultant solution was filtered through a Celite pad. Evaporation of the filtrate afforded an orange solid. The 1H and 31P-{1H} NMR spectra indicated clean formation of **6**’, although **6’** could not be obtained in an analytically pure form. H(CD2Cl2) 1.76 [15 H, d, *J*(PH) 1.4 Hz, Cp*], 1.86 [9 H, d, *J*(PH) 10.7 Hz, PMe3], 7.507.81 (15 H, m, PPh3); P(CD2Cl2, 293 K) 31.6 (1 P, s, PMe3), 16.2 (1 P, s, PPh3). ~max(NO)/cm1 1781 (KBr), 1798 (CH2Cl2). ~max(SO)/cm1 1262 (KBr).

**Characterisation of the isomers of *spy*-6**

As described in the text, the variable temperature 31P-{1H} NMR measurements of **6** (Fig. S1) indicate that one major [P(CD2Cl2, 233 K) 32.6, 0.2] and two minor [P(CD2Cl2, 233 K) 31.1, 15.0; 24.4, 3.6] isomers of **6** are in equilibrium. The IR spectrum of **6** in CH2Cl2 also shows two ~(NO) bands at 1518s and 1800m cm1. Since the solid-state IR spectrum of the crystalline sample of **6**, which is confirmed to be the *spy* isomer by X-ray crystallography, shows one ~(NO) band at exactly the same frequency as the major species of **6** in CH2Cl2, we believe that *spy*-**6** is the major isomer of **6** in solution.

To gain some insight into the minor isomers, we next replaced the terminal iodo ligand in **6** by less coordinating triflate anion. Addition of an equimolar amount of AgOSO2CF3 to a THFsolution of **6** afforded the cationic complex [Cp*Ir(PMe3)(-I)(-S)Ir(NO)(PPh3)][OSO2CF3] **6’** as a single isomer. Complex **6’** exhibits a strong ~(NO) band at 1781 (in KBr) or 1798 (in CH2Cl2) cm1 in the IR spectrum, suggesting that **6’** has a linear nitrosyl ligand at the *trans* position of the most donating sulfido ligand (Chart 1). The ~(SO) band appearing at 1262 cm–1 indicates that the triflate anion is non-coordinated.3 Because the frequency of the ~(NO) band as well as the resonances in the 31P{1H} NMR is in good agreement with that of one minor isomer of **6**, we concluded that one of the minor isomers is the cationic complex *sp*-**6** with a linear nitrosyl ligand.

**Chart 1.** Possible isomers of **6**

As for the third isomer, we have not obtained conclusive experimental results to determine the structure. Possible structures include stereoisomers of *spy*-**6** such as *anti*-*spy*-**6** and isomeric forms with a trigonal bipyramidal iridium centre such as *tb*-**6** and *anti*-*tb*-**6**.

**Crystallography**

Single crystals suitable for X-ray analyses were sealed in glass capillaries under an inert atmosphere and mounted on a Rigaku AFC7R four-circle diffractometer equipped with a graphite-monochromatized Mo K source ( = 0.710 69 Å). Orientation matrixes and unit cell parameters were determined by least-squares treatment of 25 machine-centred reflections with 25 < 2 < 40. The data collection was performed at 294 K using the 2 scan technique at a rate of 32min1 to a maximum 2 value of 55. The intensities of three check reflections were monitored every 150 reflections during data collection, which revealed no significant decay. Intensity data were corrected for Lorentzpolarization effects and for absorption ( scans).

Structure solution and refinements were carried out by using the teXsan program package.4 The heavy-atom positions were determined by a Patterson method program (DIRDIF92-PATTY5), and the remaining non-hydrogen atoms were found by subsequent Fourier syntheses. All non-hydrogen atoms were refined anisotropically by full-matrix least squares techniques (based on *F*). All hydrogen atoms were placed at calculated positions and included in the final stages of the refinements with fixed parameters. The atomic scattering factors were taken from ref 6, and anomalous dispersion effects were included; the values of *f*' and *f*'' were taken from ref 7.

## References

1 N. Ahmad, J. J. Levinson, S. D. Robinson and M. F. Uttley, *Inorg. Synth.*, 1974, **15**, 45.

2 D. P. Klein, G. M. Kloster and R. G. Bergman, *J. Am. Chem. Soc.*, 1990, **112**, 2022.

3 G. A. Lawrance, *Chem. Rev.*, 1986, **86**, 17.

4TEXSAN, Crystal Structure Analysis Package, Molecular Structure Corp., The Woodlands, TX, USA, 1985 and 1999.

5 P. T. Beurskens, G. Admiraal, G. Beurskens, W. P. Bosman, R. de Gelder, R. Israel and J. M. M. Smits, The DIRDIF-94 program system, Technical Report of the Crystallography Laboratory, University of Nijmengen, The Netherlands, 1994.

6 *International Tables for X-ray crystallography*; Kynoch Press: Birmingham, England, 1974; Vol. IV.

7 *International Tables for X-ray crystallography*; Kluwer Academic Publishers: Boston, MA, 1992; Vol. C.

**Fig. S1.** Variable-temperature 31P-{1H} NMR spectra of **6** (162 MHz, in CD2Cl2).


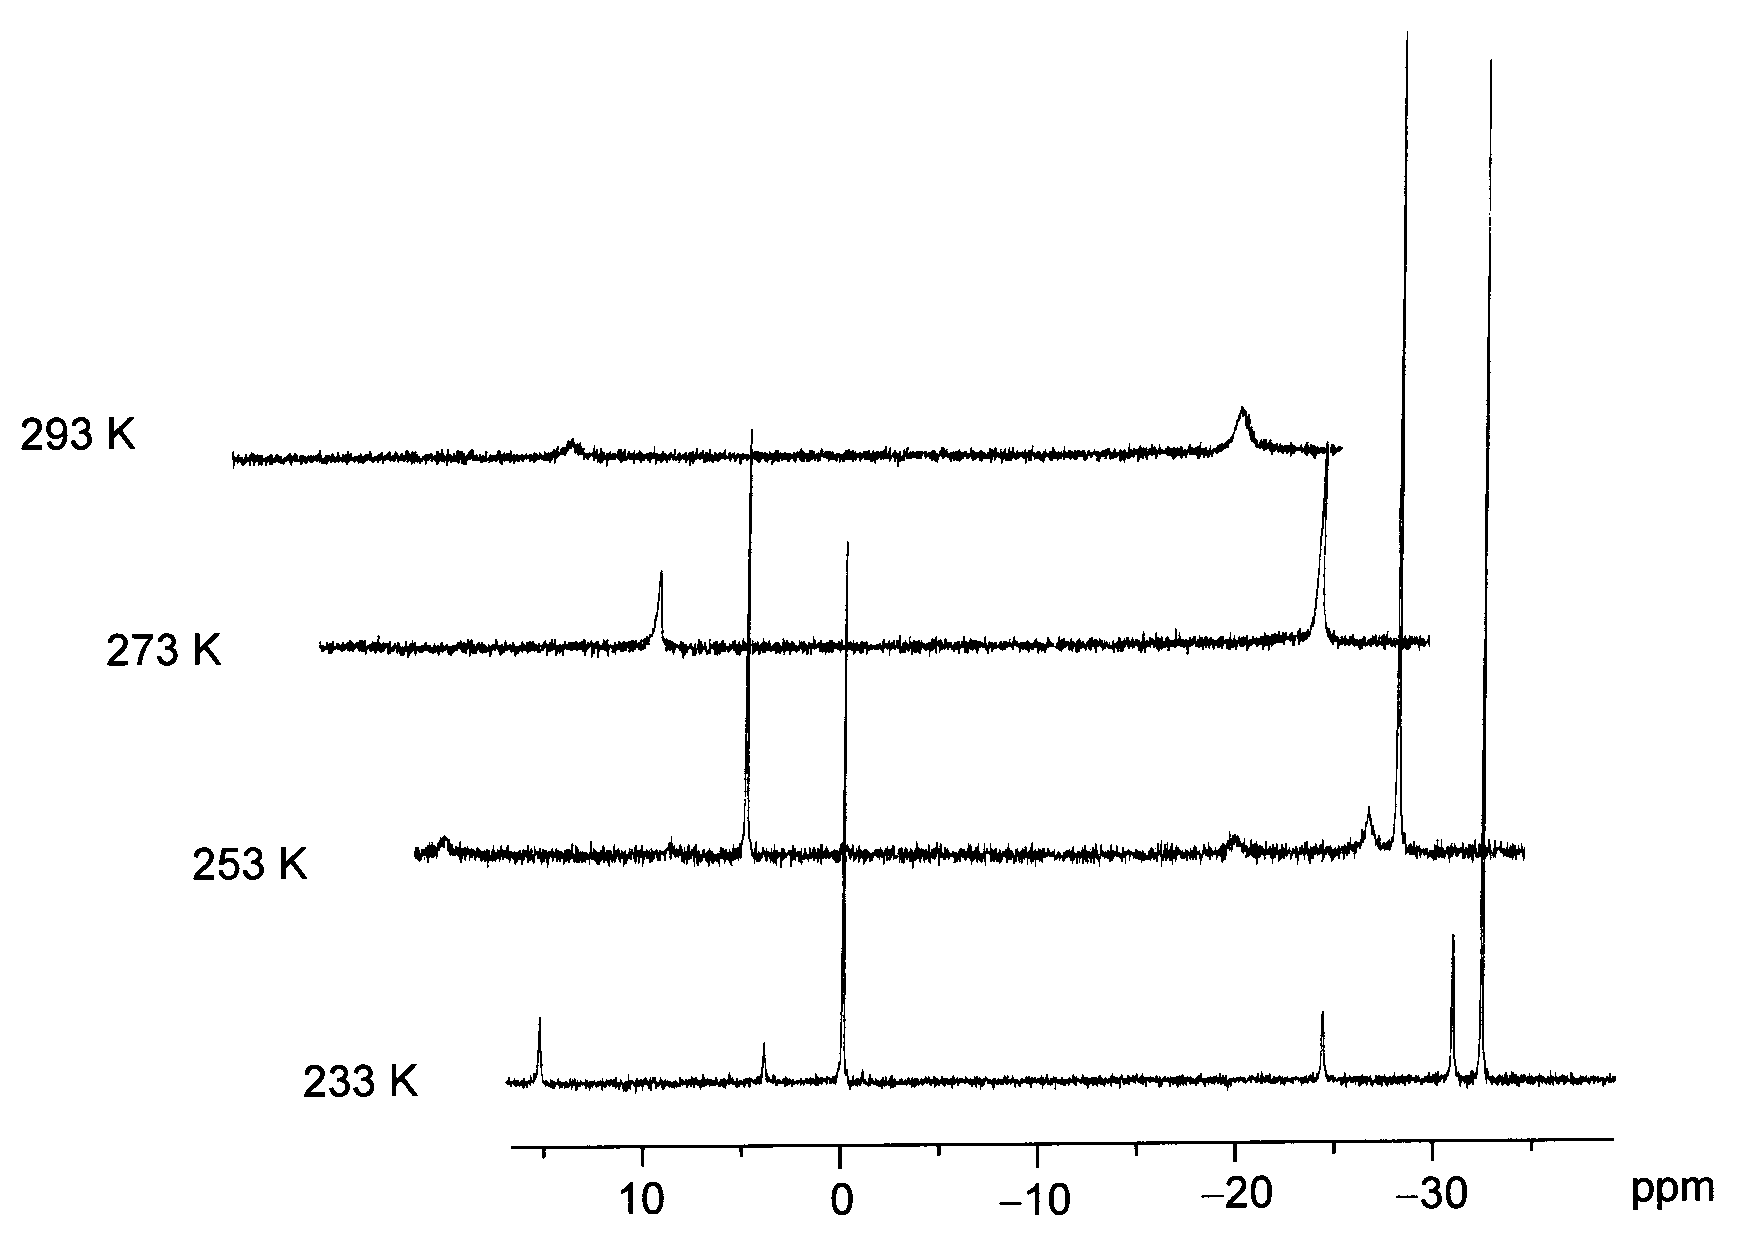


**Fig. S2.** IR spectrum of a CH2Cl2 solution of **6**.


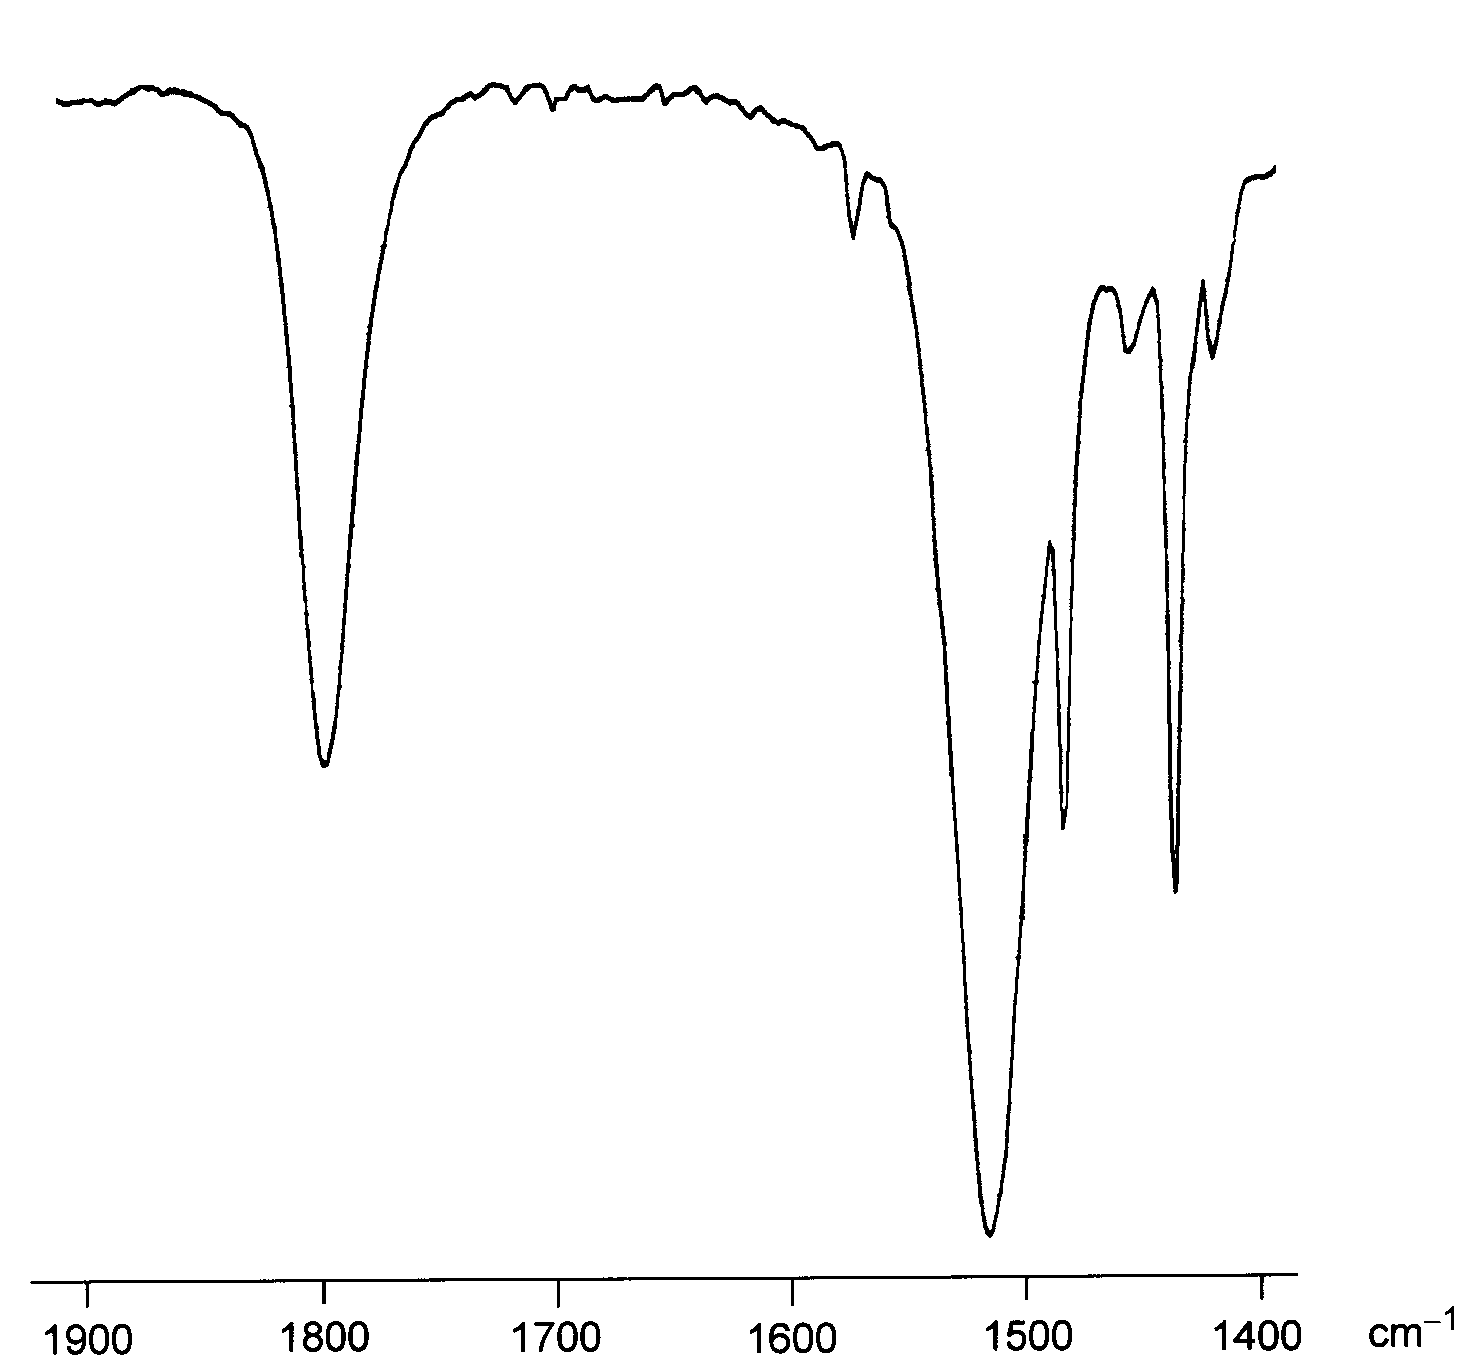

Supplement: esi.doc [file esi.doc]
